# Table of Contents

## EDITORIAL

**Sharing in the Classroom**  
 William B. Wood.....263–264

## LETTER TO THE EDITOR

**The Quiz Factor**  
 Daniel J. Klionsky.....265–266

## FEATURES

*Approaches to Biology Teaching and Learning*  
**Making Biology Learning Relevant to Students: Integrating People, History, and Context into College Biology Teaching**  
 Katayoun Chamany, Deborah Allen, and Kimberly Tanner.....267–278

*From the National Academies*  
**Working Together to Address Challenges to the Teaching of Evolution**  
 Ida Chow and Jay B. Labov.....279–283

*WWW.Life Sciences Education*  
**Plant Movements Revealed**  
 Louisa A. Stark.....284–287

*Current Insights*  
**Recent Research in Science Teaching and Learning**  
 Erin Dolan.....288–289

*Educator Highlight*  
**David Wells**  
 Interviewed by Laura L. Mays Hoopes.....290–291

*Educator Highlight*  
**Gregory Florant**  
 Interviewed by Laura L. Mays Hoopes.....292–293

*Book Review*  
**Learning the Lingo**  
 Laurie J. Heyer.....294–295

## ESSAY

**Online Protocol Annotation: A Method to Enhance Undergraduate Laboratory Research Skills**  
 Julie E. Ruble and Barbara Lom.....296–301

## ARTICLES

**Money, Sex, and Drugs: A Case Study to Teach the Genetics of Antibiotic Resistance**  
 Karen A. Cloud-Hansen, Jason N. Kuehner, Lillian Tong, Sarah Miller, and Jo Handelsman.....302–309

**An Innovative Plant Genomics and Gene Annotation Program for High School, Community College, and University Faculty**  
 Gokhan Hacisalihoglu, Uwe Hilgert, E. Bruce Nash, and David A. Micklos.....310–316

**Teaching Statistics in Biology: Using Inquiry-based Learning to Strengthen Understanding of Statistical Analysis in Biology Laboratory Courses**  
 Anneke M. Metz.....317–326

**Community-based Inquiry Improves Critical Thinking in General Education Biology**  
 Ian J. Quitadamo, Celia L. Faiola, James E. Johnson, and Martha J. Kurtz.....327–337

**Assessing the Influence of Field- and GIS-based Inquiry on Student Attitude and Conceptual Knowledge in an Undergraduate Ecology Lab**  
 M. E. Simmons, X. B. Wu, S. L. Knight, and R. R. Lopez.....338–345

### *On the Cover*

This time-lapse video of radish seed germination and growth entitled “Racing Radishes,” from the Mindlapse website at <http://www.dcpages.net>, is one of a number of online videos and other materials on plant movements reviewed by Louisa Stark in this issue. See her feature “WWW.Life Sciences Education: Plant Movements Revealed,” on page 284.
